# Supplementary material for: Changes in the Incidence of Infantile Spinal Muscular Atrophy in Shikoku, Japan between 2011 and 2020
Source: MDPI journal article supplement (doi:10.3390/ijns8040052), 2022-09-26
Supplement: s1 [file s1]

Table S1 Total populations of Japan and Shikoku, 2011–2020

| Year | Japan       |            |            | Shikoku   |           |           |
|------|-------------|------------|------------|-----------|-----------|-----------|
|      | Total       | Male       | Female     | Total     | Male      | Female    |
| 2011 | 127,799,000 | 62,184,000 | 65,615,000 | 3,953,000 | 1,874,000 | 2,080,000 |
| 2012 | 127,515,000 | 62,029,000 | 65,486,000 | 3,932,000 | 1,864,000 | 2,067,000 |
| 2013 | 127,298,000 | 61,909,000 | 65,388,000 | 3,905,000 | 1,852,000 | 2,053,000 |
| 2014 | 127,083,000 | 61,801,000 | 65,282,000 | 3,878,000 | 1,840,000 | 2,038,000 |
| 2015 | 127,095,000 | 61,842,000 | 65,253,000 | 3,845,000 | 1,829,000 | 2,017,000 |
| 2016 | 126,933,000 | 61,766,000 | 65,167,000 | 3,818,000 | 1,817,000 | 2,002,000 |
| 2017 | 126,706,000 | 61,655,000 | 65,051,000 | 3,788,000 | 1,804,000 | 1,984,000 |
| 2018 | 126,443,000 | 61,532,000 | 64,911,000 | 3,756,000 | 1,789,000 | 1,967,000 |
| 2019 | 126,167,000 | 61,411,000 | 64,756,000 | 3,721,000 | 1,774,000 | 1,947,000 |
| 2020 | 126,146,000 | 61,350,000 | 64,797,000 | 3,697,000 | 1,762,000 | 1,934,000 |

Data cited from Portal Site of Official Statistics of Japan (<https://www.e-stat.go.jp/en>; accessed 2022-08-11).
