# Supplementary material for: Changes in the Incidence of Infantile Spinal Muscular Atrophy in Shikoku, Japan between 2011 and 2020
Source: MDPI journal article supplement (doi:10.3390/ijns8040052), 2022-09-26
Supplement: s1 [file s1]

Table S2 Live births in Japan and Shikoku, 2011–2020

| Year | Japan     |  | Shikoku | Prefecture |        |           |       |
|------|-----------|--|---------|------------|--------|-----------|-------|
|      | Total     |  | Total   | Ehime      | Kagawa | Tokushima | Kochi |
| 2011 | 1,050,807 |  | 30,798  | 11,329     | 8,311  | 5,914     | 5,244 |
| 2012 | 1,037,232 |  | 30,301  | 11,130     | 8,161  | 5,744     | 5,266 |
| 2013 | 1,029,817 |  | 29,687  | 10,696     | 8,059  | 5,666     | 5,266 |
| 2014 | 1,003,609 |  | 28,661  | 10,399     | 7,745  | 5,502     | 5,015 |
| 2015 | 1,005,721 |  | 28,503  | 10,146     | 7,719  | 5,586     | 5,052 |
| 2016 | 977,242   |  | 27,546  | 9,911      | 7,510  | 5,346     | 4,779 |
| 2017 | 946,146   |  | 26,975  | 9,569      | 7,387  | 5,182     | 4,837 |
| 2018 | 918,400   |  | 25,786  | 9,330      | 6,899  | 4,998     | 4,559 |
| 2019 | 865,239   |  | 23,901  | 8,446      | 6,631  | 4,554     | 4,270 |
| 2020 | 840,835   |  | 22,884  | 8,102      | 6,179  | 4,521     | 4,082 |

Data cited from Portal Site of Official Statistics of Japan (<https://www.e-stat.go.jp/en>; accessed 2022-08-11).
