# Supplementary material for: Changes in the Incidence of Infantile Spinal Muscular Atrophy in Shikoku, Japan between 2011 and 2020
Source: Int J Neonatal Screen. 2022 Sep 26;8(4):52. doi: 10.3390/ijns8040052 (PMC9590054; doi:10.3390/ijns8040052)
Supplement: Supplementary file 1 [file IJNS-08-00052-s001.zip]

Archive with 4 entries (4 files):
- File_S1.pdf
- File_S2.pdf
- Table_S1.pdf
- Table_S2.pdf
